# Supplementary material for: UV Light Causes Structural Changes in Microplastics Exposed in Bio-Solids
Source: MDPI journal article supplement (doi:10.3390/polym15214322), 2023-11-04
Supplement: s1 [file s1]

# UV Light Causes Structural Changes in Microplastics Exposed in Bio-Solids

Somayye Sadat Alavian Petroody <sup>1</sup>, Seyed Hossein Hashemi <sup>1</sup>, Luka Škrlep <sup>2</sup>, Branka Mušič <sup>2</sup>, Cornelis A.M. van Gestel <sup>3</sup> and Andrijana Sever Škapin<sup>2,4,\*</sup>

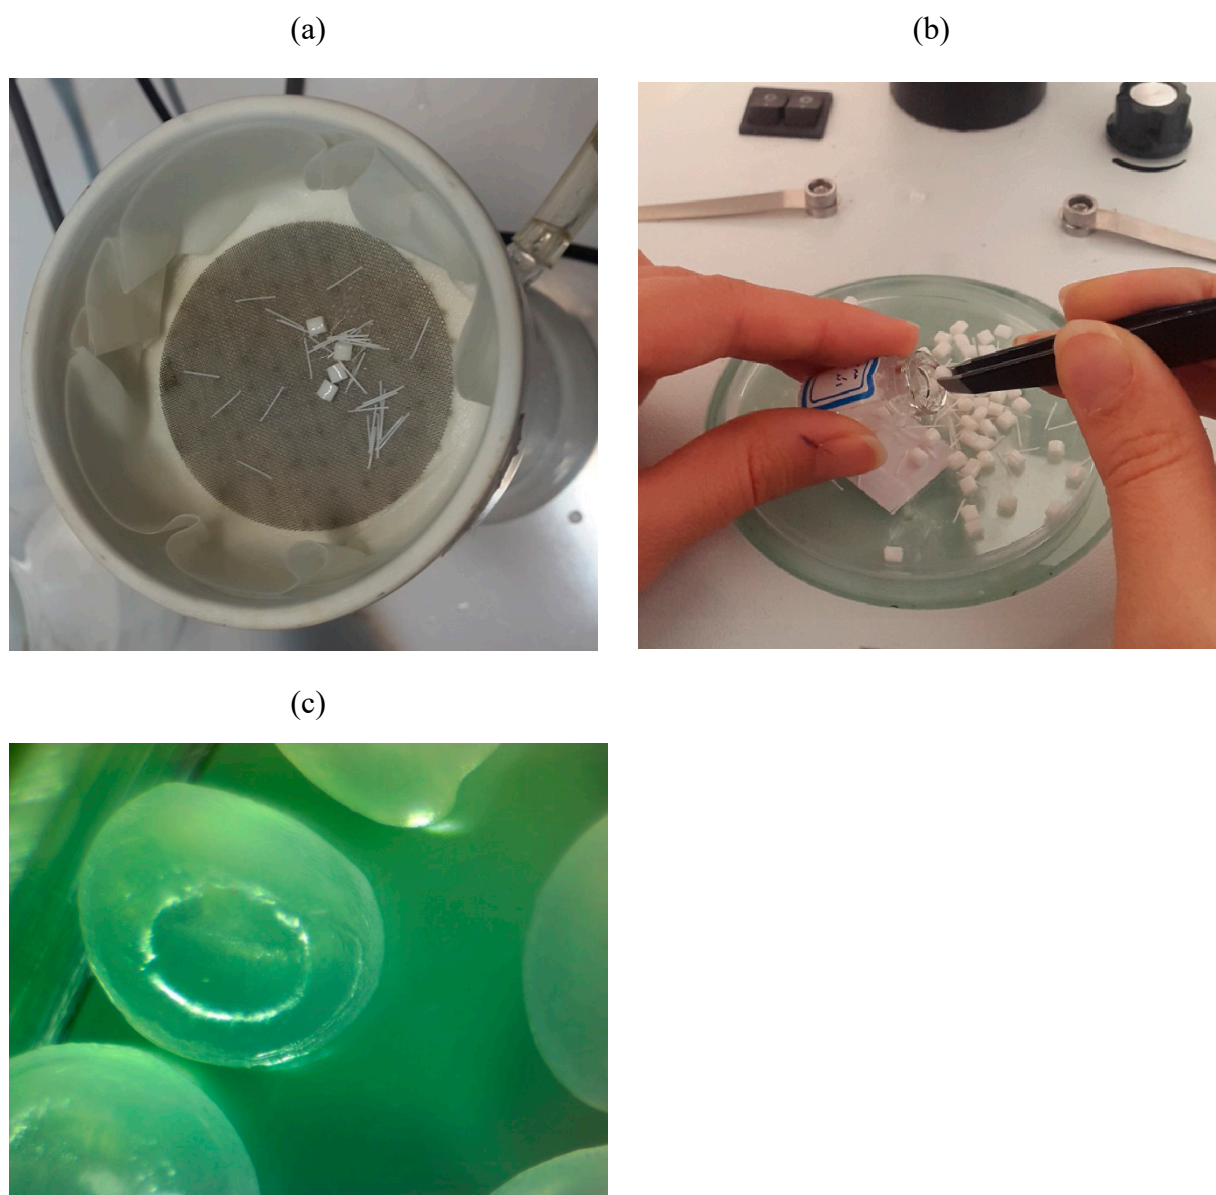

**Figure S1.** Photos of the samples: (a) lines and granules on filter system, (b) granules, (c) zoom of granules.

(a)

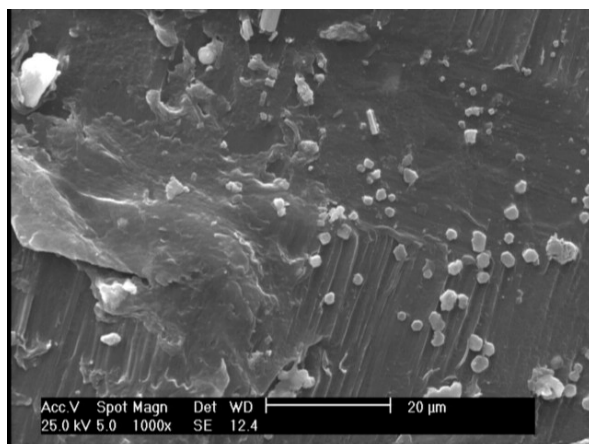

(b)

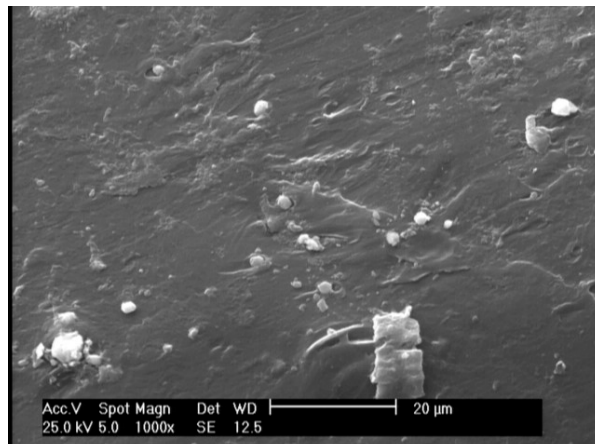

(c)

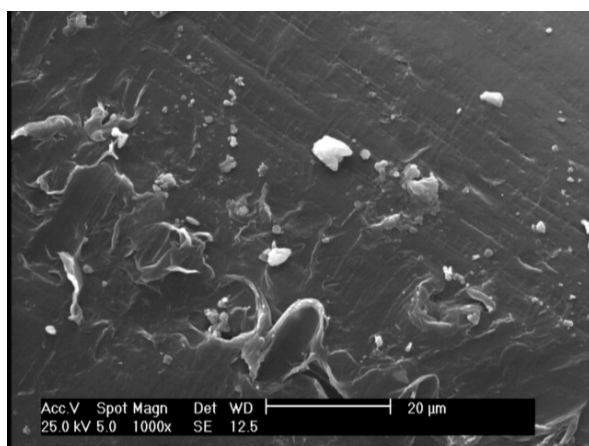

(d)

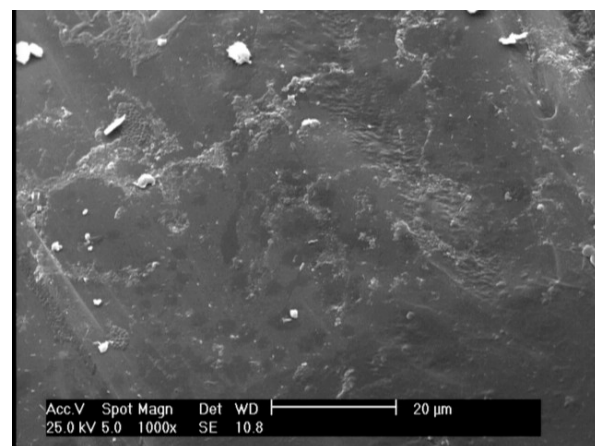

(e)

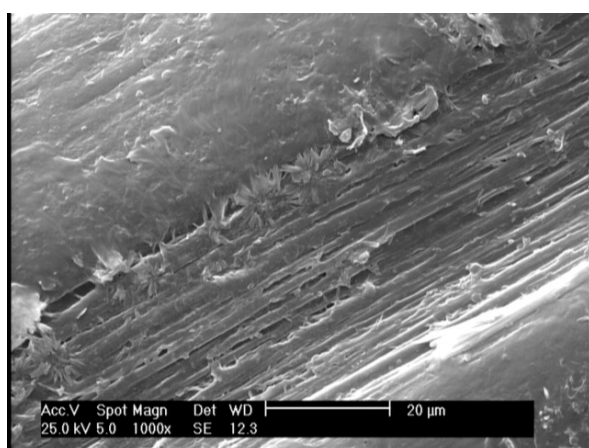

(f)

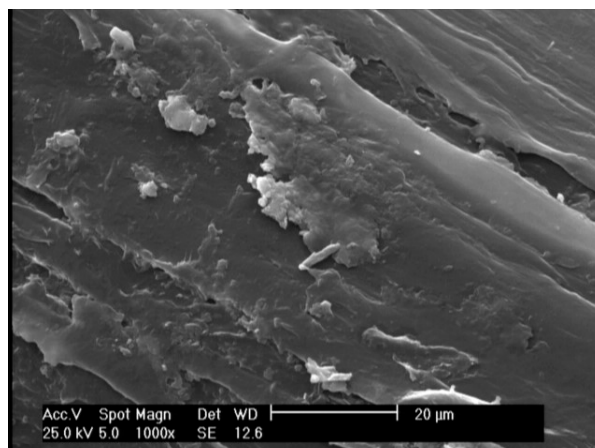

**Figure S2.** SEM images of: - **first line** (a) PE lines and (b) PP lines after 48h exposure to UVA; **second line** (c) PE granules and (d) PP granules after 24h exposure to UVA; **third line** (e) PE granules and (f) PP granules after 48 h exposure to UVC.

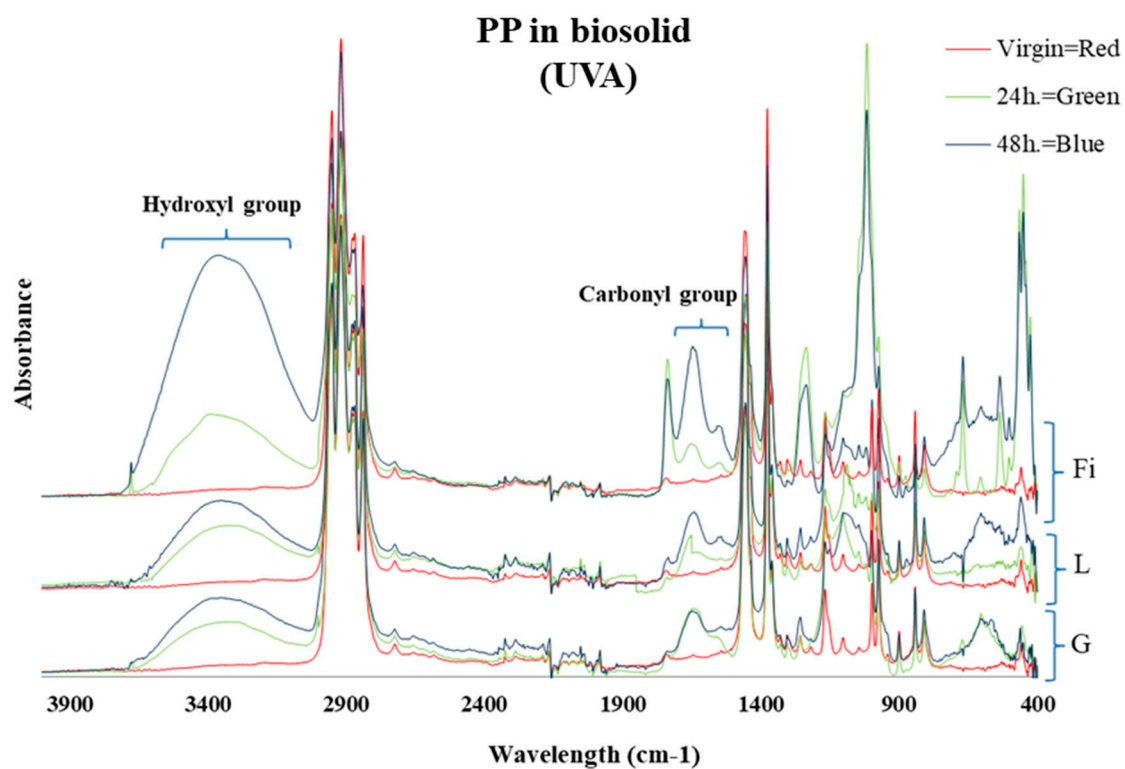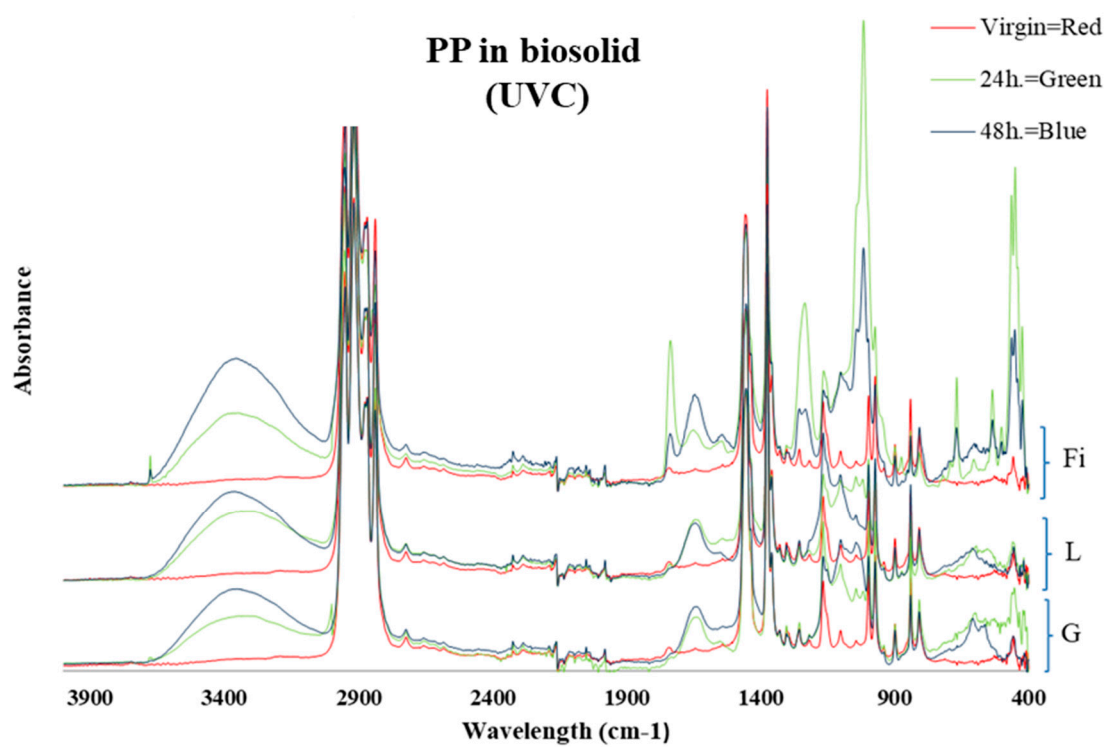

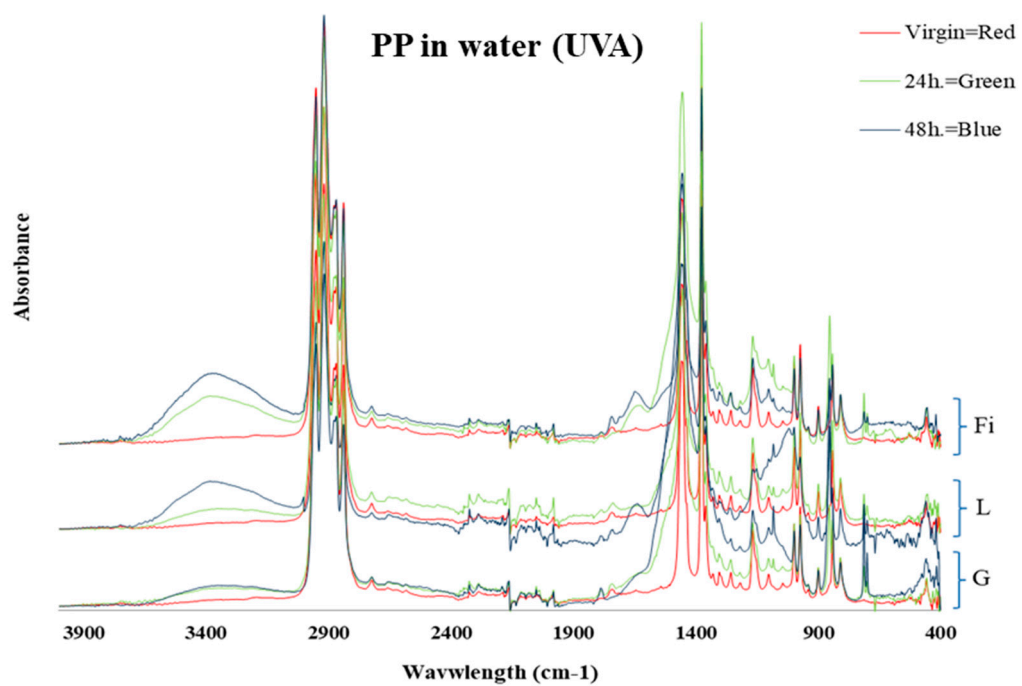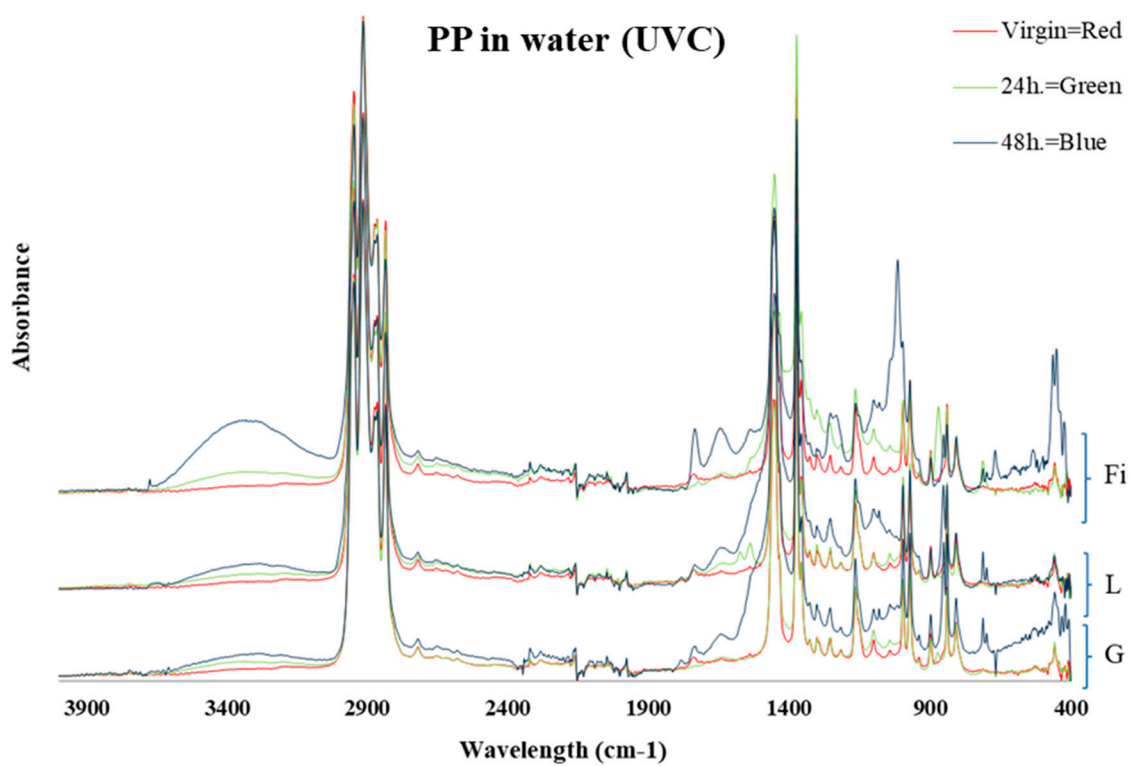

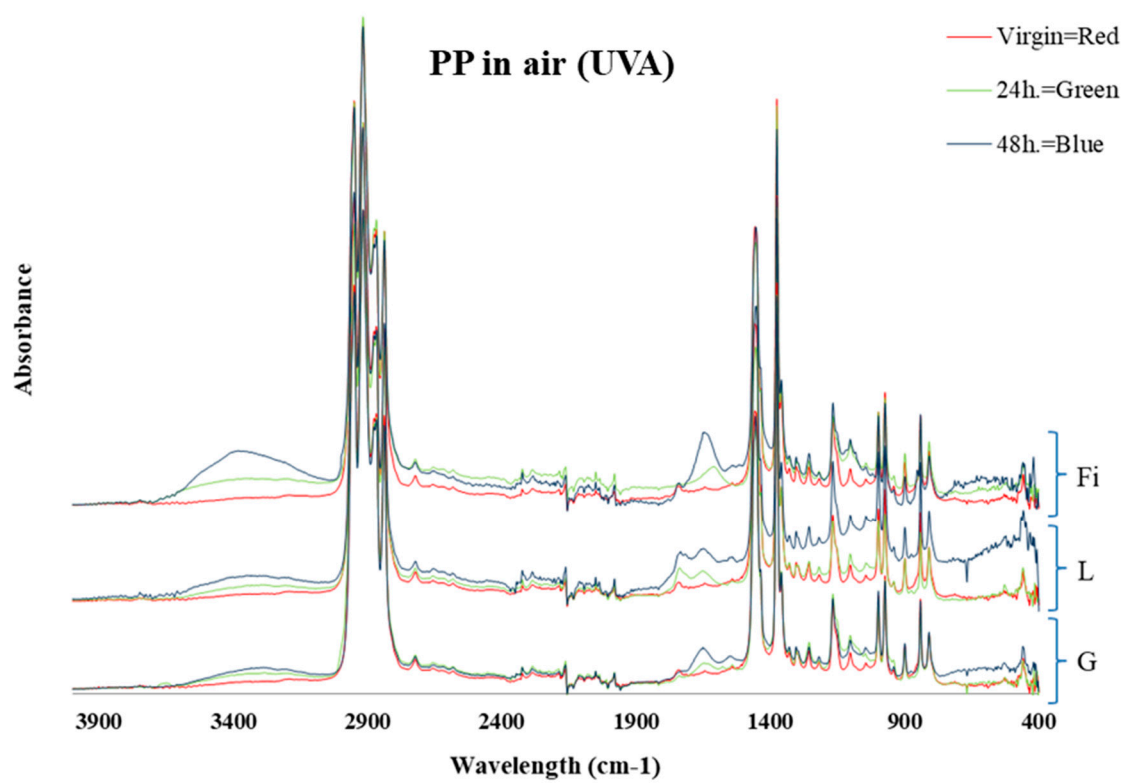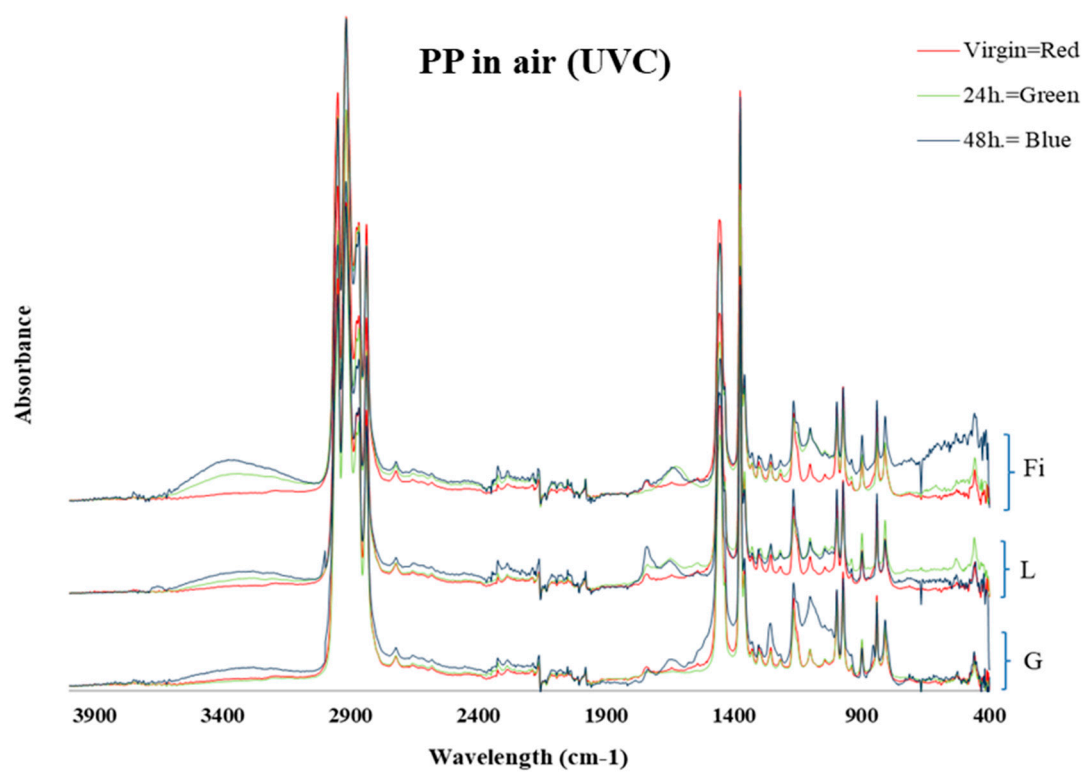

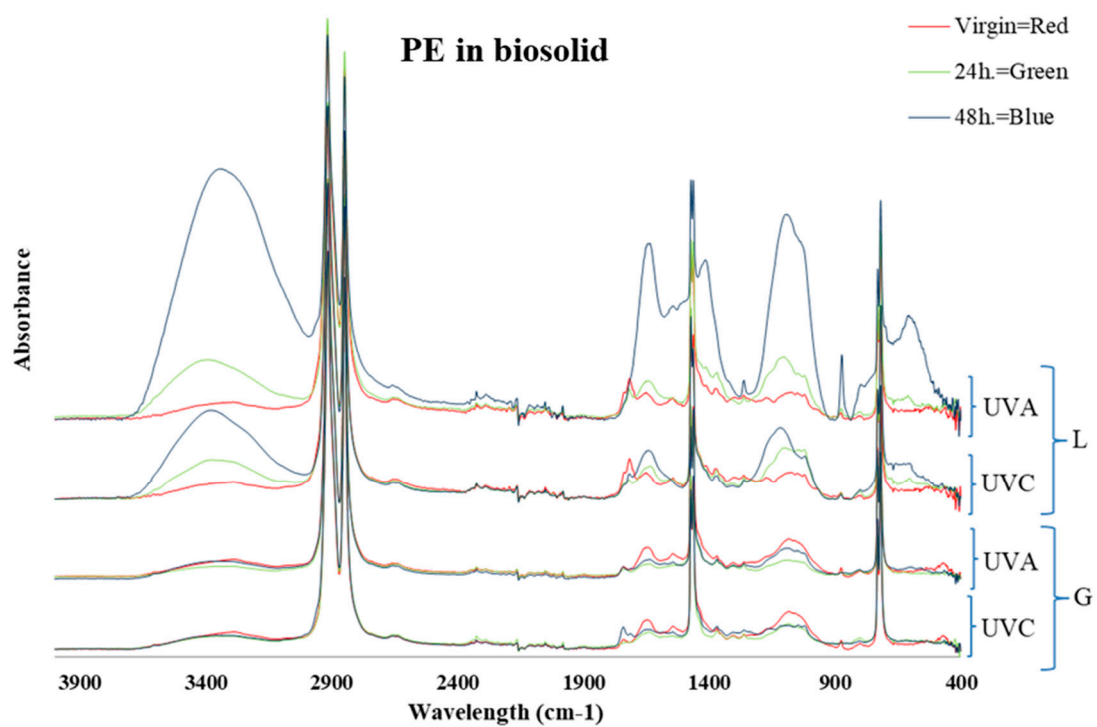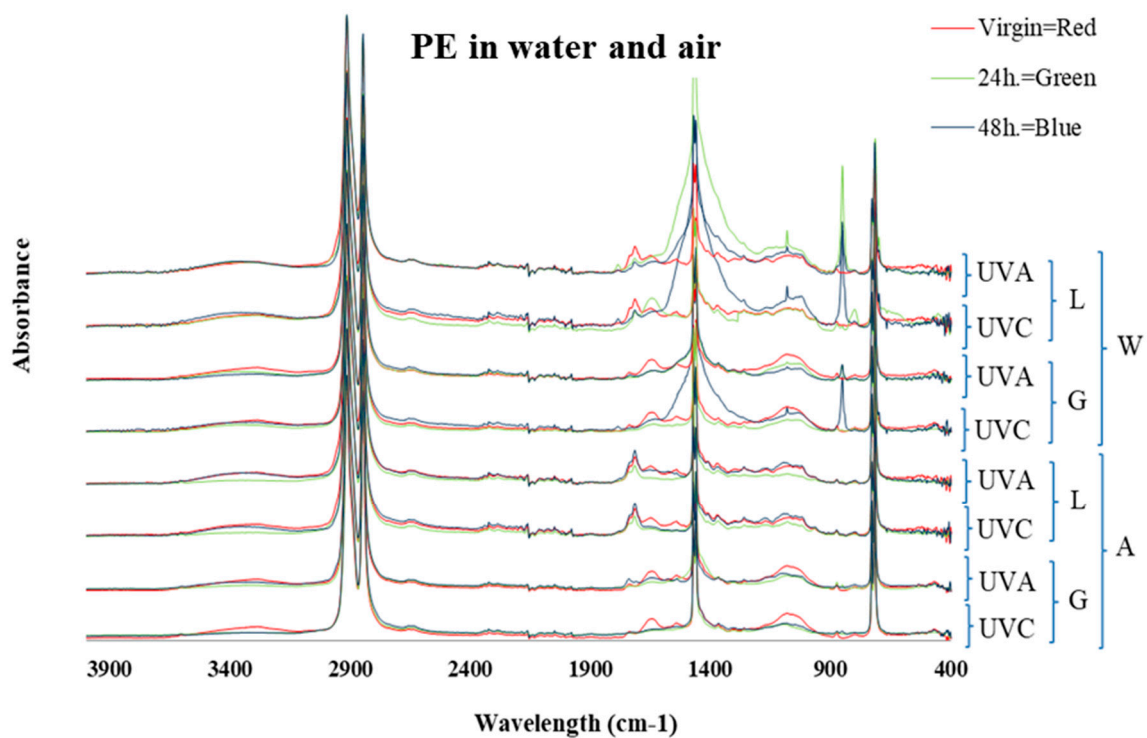

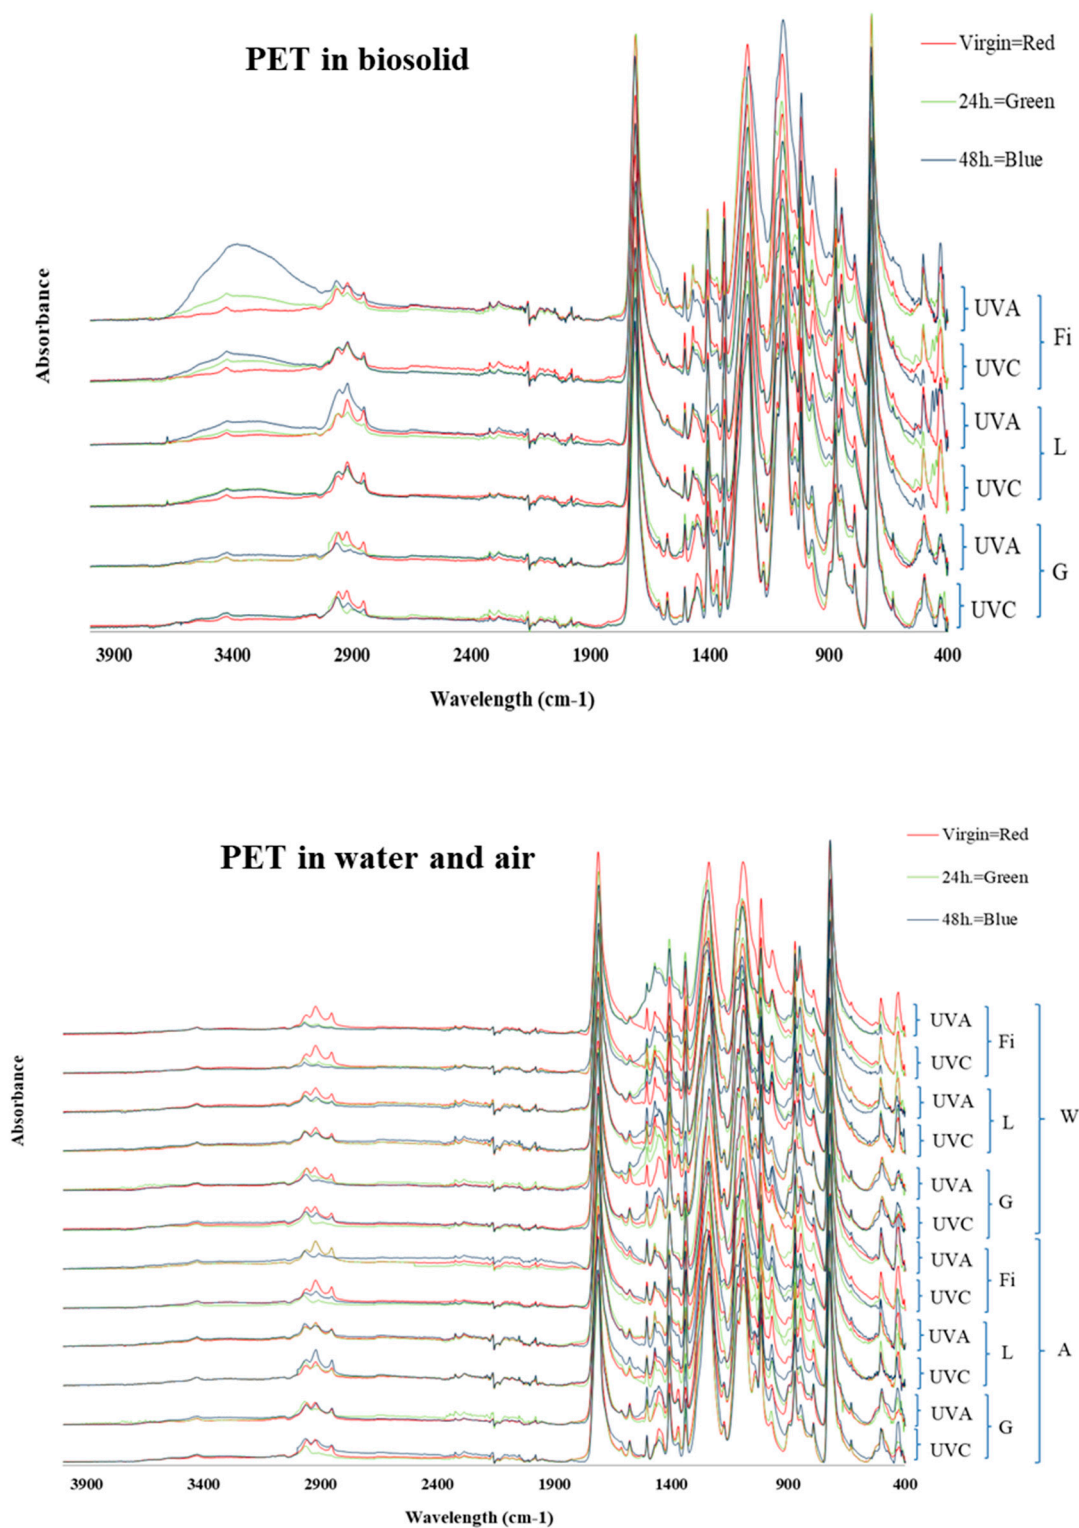

**Figure S3.** FTIR spectra ( $400\text{--}4000\text{ cm}^{-1}$ ) and induction of carbonyl ( $\text{C}=\text{O}$ ;  $\sim 1700\text{ cm}^{-1}$ ) and hydroxyl ( $\text{OH}$ ,  $\sim 3300\text{ cm}^{-1}$ ) groups in different shapes of polypropylene (PP) microplastics in air, water and biosolids exposed for 24 h and 48 h to UV-A and UV-C light, at  $70^\circ\text{C}$ , and compared with virgin (reference) samples. (Y axis is related to the adsorption peaks). Fi: Filament, L: line, G: Granule, W: water, A: Air.

**Table S1.** CI and HI for virgin samples (the samples at 0 min of UV irradiation).

| HI | PP   | PE    | PET  |
|----|------|-------|------|
| Fi | 1.04 | ----- | 0.98 |
| L  | 1.04 | 1.02  | 0.99 |
| G  | 1.04 | 1.01  | 1    |

| CI | PP   | PE   | PET |
|----|------|------|-----|
| Fi | 1.03 | ---- | 1   |
| L  | 1.03 | 1.03 | 1   |
| G  | 1.03 | 1.03 | 1   |
